# Supplementary material for: Patterns in Weight and Physical Activity Tracking Data Preceding a Stop in Weight Monitoring: Observational Analysis
Source: PubMed Central journal article supplement (PMC7109615; doi:10.2196/15790), 2020-03-17
Supplement: jmir_v22i3e15790_app1.pdf [file jmir_v22i3e15790_app1.pdf]

## Results of GEE Models

### Research Question 1

Table A. Results of the GEE models testing sensitivity to the normality assumption for pre-specified analyses of RQ1.

| Variable                             | $\beta$ | <i>P</i> |
|--------------------------------------|---------|----------|
| Weight Change                        | 0.73    | <.001    |
| Physical Activity Tracking Frequency | -3.4    | <.001    |
| Average Daily Steps                  | -0.22   | .059     |

Table B. Results of the GEE models testing sensitivity to the normality assumption for post-hoc analyses of RQ1.

| Variable                             | $\beta$ | <i>P</i> |
|--------------------------------------|---------|----------|
| Weight Change                        |         |          |
| TP1 to TP2                           | 0.40    | <.001    |
| TP1 to TP3                           | 0.43    | <.001    |
| TP2 to TP3                           | 0.03    | .85      |
| Physical Activity Tracking Frequency |         |          |
| TP1 to TP2                           | -1.3    | <.001    |
| TP1 to TP3                           | -2.3    | <.001    |
| TP2 to TP3                           | -1.0    | <.001    |
| Average Daily Steps                  |         |          |
| TP1 to TP2                           | -0.18   | .007     |
| TP1 to TP3                           | -0.31   | <.001    |
| TP2 to TP3                           | -0.13   | .014     |

### Research Question 2

Table C. Results of the GEE models testing sensitivity to the normality assumption for pre-specified analyses of RQ2.

| Variable                             | $\beta$ | <i>P</i> |
|--------------------------------------|---------|----------|
| Physical Activity Tracking Frequency |         |          |
| TP1 to TP2                           | -3.3    | <.001    |
| TP1 to TP3                           | -10.0   | <.001    |
| TP2 to TP3                           | -6.6    | <.001    |
| Average Daily Steps                  |         |          |
| TP1 to TP2                           | -0.14   | .011     |
| TP1 to TP3                           | 0.04    | .879     |
| TP2 to TP3                           | 0.18    | .060     |
